# Supplementary material
Source: publisher figshare collection journal article supplement (https://acs.figshare.com/ndownloader/files/5054299)
Supplement: Supplementary file 1 [file 5054299]

**SUPPORTING INFORMATION**

for

**Bin-Salamon, Brewer, Depperman, Franzen, Kampf, Kirk, Kumar, Lappi, Peariso, Preuss, and Shultz** "Bridge-mediated Differences in Dinuclear Valence Tautomeric Behavior"

**Submitted to:** *Inorganic Chemistry*

**Table 1.** Crystal data and structure refinement for **1** and **2**.

| Empirical formula                     | C <sub>82</sub> H <sub>98</sub> N <sub>4</sub> O <sub>8</sub> Co <sub>2</sub> •(1•2C <sub>7</sub> H <sub>8</sub> ) | C <sub>107</sub> H <sub>130</sub> N <sub>4</sub> O <sub>8</sub> Co <sub>2</sub> (2•3C <sub>7</sub> H <sub>8</sub> ) |
|---------------------------------------|--------------------------------------------------------------------------------------------------------------------|---------------------------------------------------------------------------------------------------------------------|
| <i>a</i> /Å                           | 16.862(3)                                                                                                          | 20.633(4)                                                                                                           |
| <i>b</i> /Å                           | 26.337(5)                                                                                                          | 19.207(3)                                                                                                           |
| <i>c</i> /Å                           | 26.737(5)                                                                                                          | 24.055(4)                                                                                                           |
| β/deg                                 | 124.136(3)                                                                                                         | 95.452(7)                                                                                                           |
| <i>V</i> /Å <sup>3</sup>              | 9828(3)                                                                                                            | 9490(3)                                                                                                             |
| <i>Z</i>                              | 4                                                                                                                  | 4                                                                                                                   |
| Formula weight                        | 1641.88                                                                                                            | 1718.01                                                                                                             |
| Crystal system, space group           | monoclinic, <i>P</i> 2 <sub>1</sub> / <i>c</i> (purple plate)                                                      | Monoclinic, <i>P</i> 2 <sub>1</sub> / <i>n</i> (purple block)                                                       |
| <i>T</i> /K                           | 123(2)                                                                                                             | 133(2)                                                                                                              |
| ρ/Å <sup>3</sup>                      | 0.71073                                                                                                            | 0.71073                                                                                                             |
| ρ <sub>calc</sub> /g cm <sup>-3</sup> | 1.110                                                                                                              | 1.202                                                                                                               |
| ρ/cm <sup>-1</sup>                    | 3.91                                                                                                               | 4.08                                                                                                                |
| <i>R</i> <sup><i>d</i></sup>          | 0.0755 <sup><i>c</i></sup>                                                                                         | 0.0753 <sup><i>d</i></sup>                                                                                          |
| <i>wR</i> 2 <sup><i>b</i></sup>       | 0.1447 <sup><i>c</i></sup>                                                                                         | 0.1692 <sup><i>d</i></sup>                                                                                          |

<sup>a</sup>Quantity minimized =  $R = \Sigma ||F_o| - |F_c|| / \Sigma |F_o|$ . <sup>b</sup> $wR2 = \Sigma [w(F_o^2 - F_c^2)^2] / \Sigma [(wF_o^2)^2]^{1/2}$ . <sup>c</sup> $w = 1 / [\sigma^2(F_o^2) + (0.0475P)^2 + 0.00P]$ ,  $P = [2F_c^2 + F_o^2] / 3$ . <sup>d</sup> $w = 1 / [\sigma^2(F_o^2) + (0.1057P)^2 + 8.8966P]$ ,  $P = (F_o^2 + 2F_c^2) / 3$ .

**Structure Determination.**

Purple plate-like crystals of **1** were crystallized from a methylene chloride / toluene solution at 23 deg. C. A crystal of dimensions 0.14 x 0.14 x 0.06 mm was mounted on a standard Bruker SMART CCD-based X-ray diffractometer equipped with a LT-2 low temperature device and normal focus Mo-target X-ray tube ( $\lambda = 0.71073$  Å) operated at 2000 W power (50 kV, 40 mA). The X-ray intensities were measured at 128(2) K; the detector was placed at a distance 4.959 cm from the crystal. A total of 1808 frames were collected with a scan width of 0.3° in  $\omega$  and an exposure time of 120 s/frame. The frames were integrated with the Bruker SAINT software package with a narrow frame algorithm. The integration of the data yielded a total of 41930

reflections to a maximum  $2\theta$  value of  $39.98^\circ$  of which 8974 were independent and 4012 were greater than  $2\sigma(I)$ . The final cell constants (Table 1) were based on the xyz centroids of 721 reflections above  $10\sigma(I)$ . Analysis of the data showed negligible decay during data collection. The data were processed with SADABS and corrected for absorption. The structure was solved and refined with the Bruker SHELXTL (version 5.10) software package using the space group  $P2(1)/c$  with  $Z = 4$  for the formula  $C_{100}H_{122}N_4O_9Co_2$ . All non-hydrogen atoms were refined anisotropically with the hydrogen atoms placed in idealized positions. Full matrix least-squares refinement based on  $F^2$  converged at  $R1 = 0.0755$  and  $wR2 = 0.1612$  [based on  $I > 2\sigma(I)$ ],  $R1 = 0.1447$  and  $wR2 = 0.1618$  for all data. Additional details are presented in Table 1 and are given as Supporting information as a CIF file.

Sheldrick, G.M. SHELXTL, v. 5.10; Bruker Analytical X-ray, Madison, WI, 1997.

Sheldrick, G.M. SADABS. Program for Empirical Absorption Correction of Area Detector Data, University of Gottingen: Gottingen, Germany, 1996.

Saint Plus, v. 6.02, Bruker Analytical X-ray, Madison, WI, 1999.

### Structure Determination.

Purple block-like crystals of **2** were crystallized from a dichloromethane/toluene solution at  $23^\circ\text{C}$ . A crystal of dimensions  $0.12 \times 0.12 \times 0.08$  mm was mounted on a standard Bruker SMART CCD-based X-ray diffractometer equipped with a LT-2 low temperature device and normal focus Mo-target X-ray tube ( $\lambda = 0.71073$  Å) operated at 2000 W power (50 kV, 40 mA). The X-ray intensities were measured at  $138(2)$  K; the detector was placed at a distance 4.959 cm from the crystal. A total of 2527 frames were collected with a scan width of  $0.3^\circ$  in  $\omega$  and  $\phi$  with an exposure time of 90 s/frame. The frames were integrated with the Bruker SAINT software package with a narrow frame algorithm. The integration of the data yielded a total of 53173 reflections to a maximum  $2\theta$  value of  $40.67^\circ$  of which 9277 were independent and 4813 were greater than  $2\sigma(I)$ . The final cell constants (Table 1) were based on the xyz centroids of 3009 reflections above  $10\sigma(I)$ . Analysis of the data showed negligible decay during data collection. The data were processed with SADABS and corrected for absorption. The structure was solved and refined with the Bruker SHELXTL (version 5.10) software package using the space group  $P2(1)/n$  with  $Z = 4$  for the formula  $C_{86}H_{106}N_4O_8Co_2 \cdot (C_7H_8)_3$ . All non-hydrogen atoms were refined anisotropically with the hydrogen atoms placed in idealized positions. Full matrix least-squares refinement based on  $F^2$  converged at  $R1 = 0.0753$  and  $wR2 = 0.1692$  [based on  $I > 2\sigma(I)$ ],  $R1 = 0.1606$  and  $wR2 = 0.2217$  for all data. Additional details are presented in Table 1 and are given as Supporting information as a CIF file.

Sheldrick, G.M. SHELXTL, v. 5.10; Bruker Analytical X-ray, Madison, WI, 1997.

Sheldrick, G.M. SADABS. Program for Empirical Absorption Correction of Area Detector Data, University of Gottingen: Gottingen, Germany, 1996.

Saint Plus, v. 6.02, Bruker Analytical X-ray, Madison, WI, 1999.

## XAS Standardization

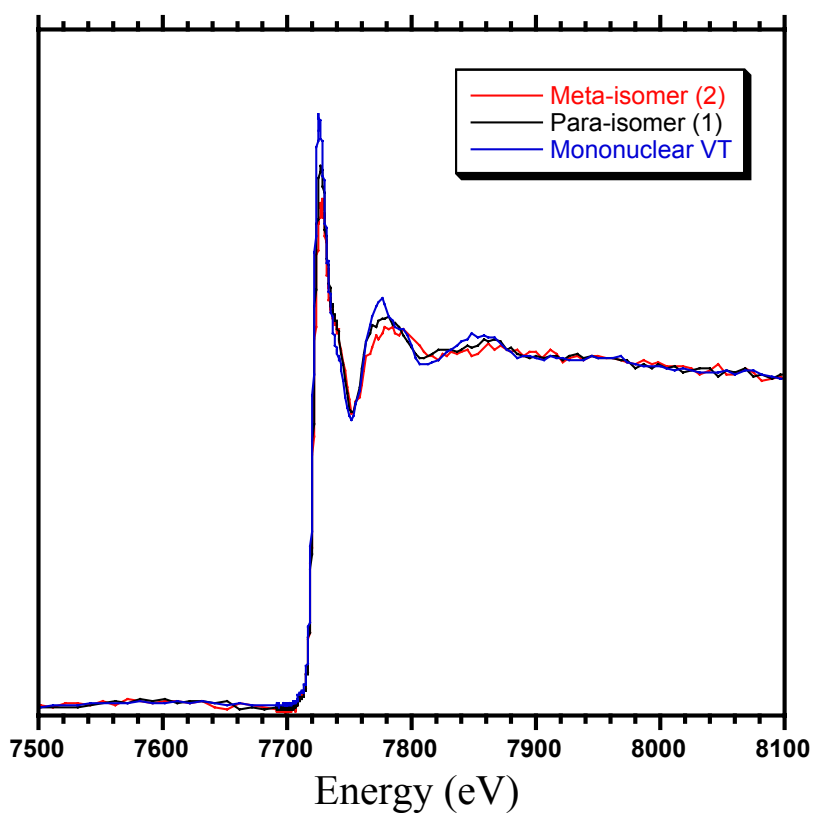

This figure shows the X-ray absorption spectra for **1** (black), **2** (red), and  $\text{Co}^{\text{III}}(3,5\text{-DBSQ})(3,5\text{-DBCat})(\text{py})$  (blue) at 10 K in poly[styrene] matrices. Since  $\text{Co}^{\text{III}}(3,5\text{-DBSQ})(3,5\text{-DBCat})(\text{py})$  is known to be in the  $\text{Co}^{\text{III}}$  form at 10 K,<sup>1</sup> and since the spectra overlay with the dimeric VT complexes, The dimeric VT complexes **1** and **2** are both in the  $\text{Co}^{\text{III}}\text{Co}^{\text{III}}$  form at 10 K.

1. Buchanan, R. M.; Pierpont, C. G. *J. Am. Chem. Soc.* **1980**, *102*, 4951.
